# Supplementary material for: Prediction of Emission Reduction Potential from Road Diesel Vehicles in the Beijing–Tianjin–Hebei (BTH) Region, China
Source: MDPI journal article supplement (doi:10.3390/atmos13050776), 2022-05-10
Supplement: s1 [file s1]

# Supplementary Materials

Xiurui Guo <sup>1,\*</sup>, Yao Liu<sup>1</sup>, Dongsheng Chen<sup>1</sup>, Xiaoqian Gong<sup>1</sup>

**Table S1.** Vehicle categories in this study corresponding with those in COPERT.

| Categories of Chinese vehicles |                     | Vehicle categories by COPERT |                              |
|--------------------------------|---------------------|------------------------------|------------------------------|
| The Statistical Yearbook       | This Study          | Category                     | Segment                      |
| Mini-size passenger cars       | Light-duty vehicles | Passenger cars               | Small                        |
| Small-size passenger cars      |                     |                              |                              |
| Medium Buses                   | Heavy-duty vehicles | Buses                        | Urban Buses Midi $\leq 15$ t |
| Large Buses                    |                     |                              | Coaches Standard $\leq 18$ t |
| Mini-size trucks               | Light-duty trucks   | Light Commercial Vehicles    | N1-II                        |
| Small-size trucks              |                     |                              |                              |
| Medium trucks                  | Heavy-duty trucks   | Heavy Duty Trucks            | Rigid 7.5-12t                |
| Large trucks                   |                     |                              | Rigid 14-32t                 |

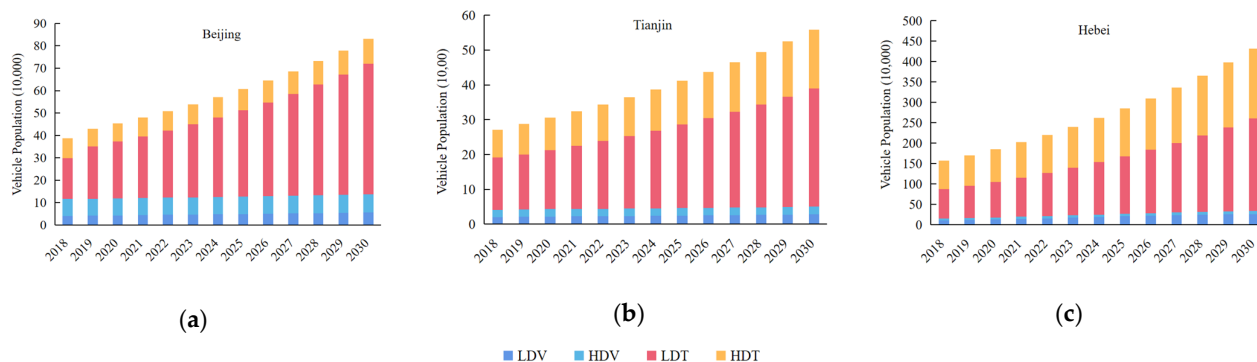

**Figure S1.** The projected population of different types of diesel vehicles in the BTH region.

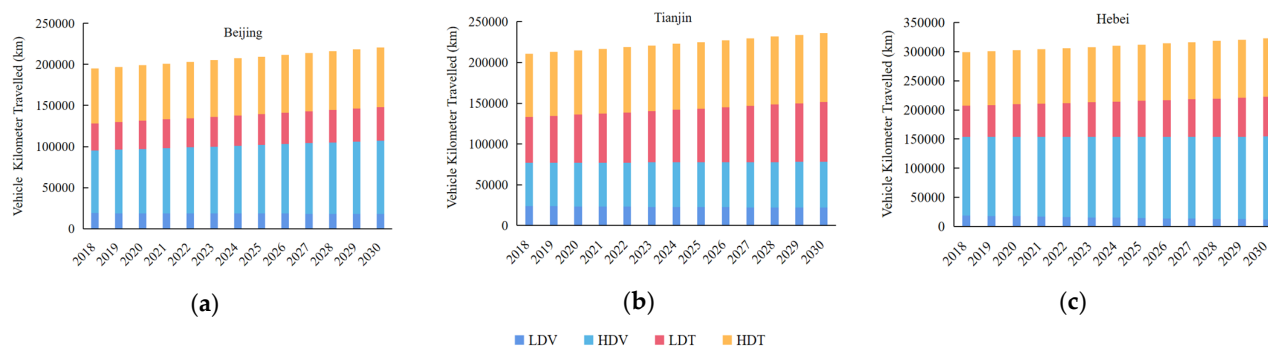

**Figure S2.** The projected VKT of different types of diesel vehicles in the BTH region.

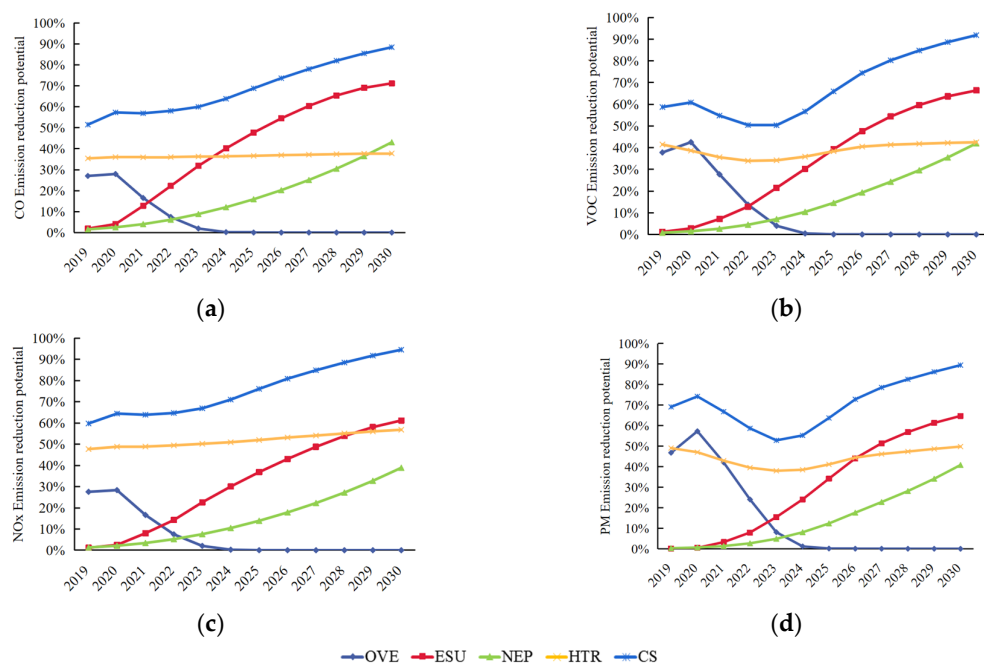

**Figure S3.** Prediction of pollutant emission-reduction potential from diesel vehicles under different policy scenarios in Tianjin.

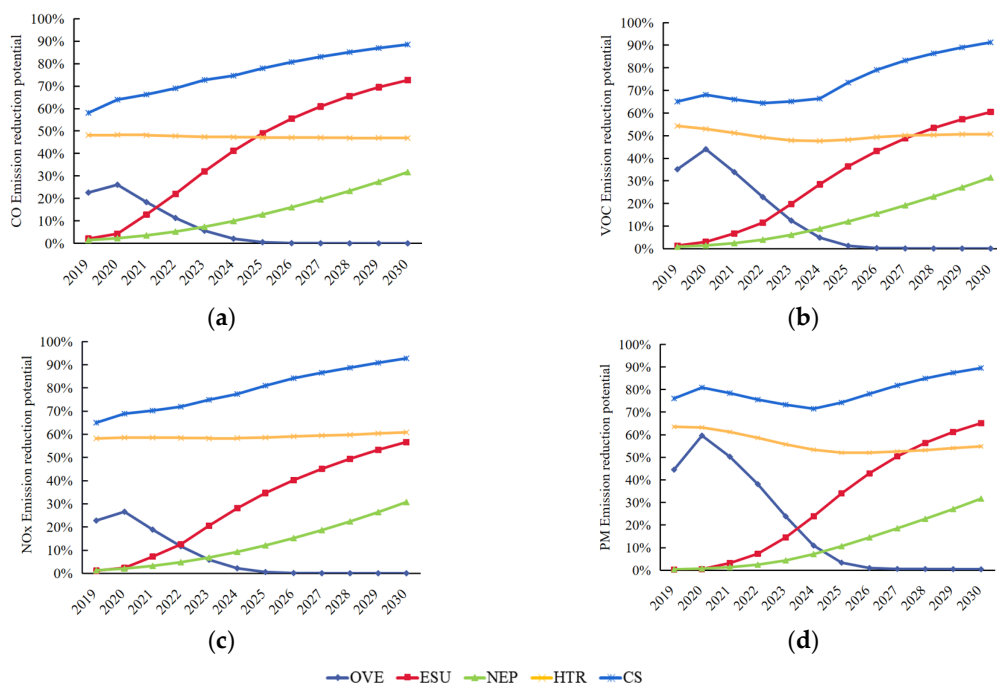

**Figure S4.** Prediction of pollutant emission-reduction potential from diesel vehicles under different policy scenarios in Hebei.

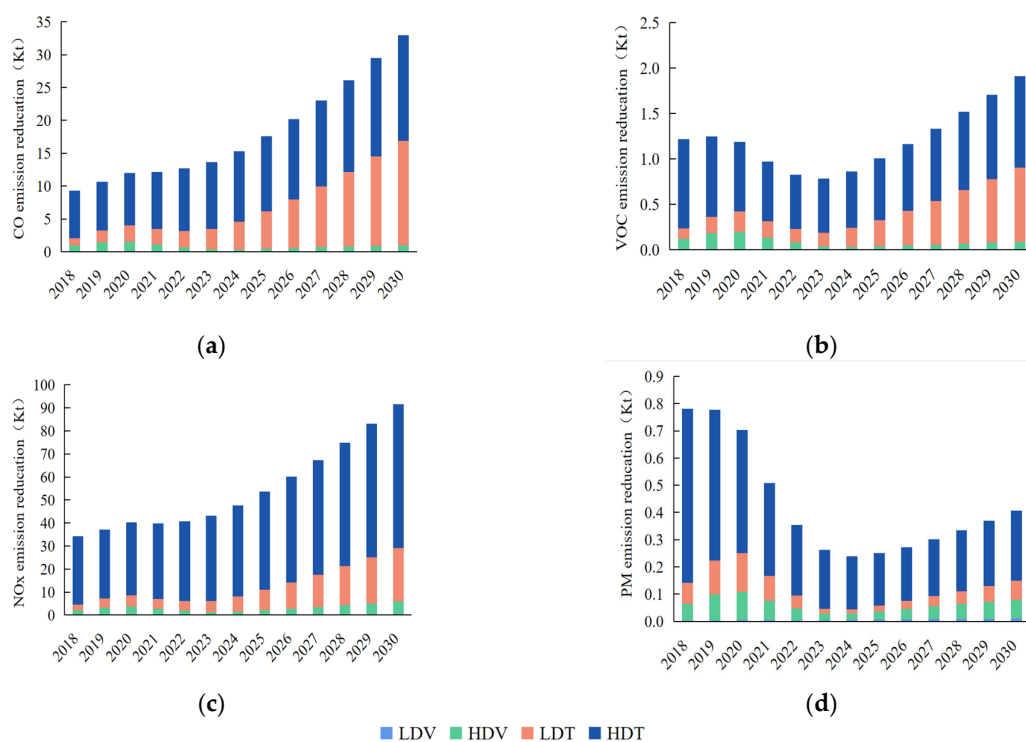

**Figure S5.** Pollutant emission reduction of diesel vehicles under the CS scenario in Tianjin.

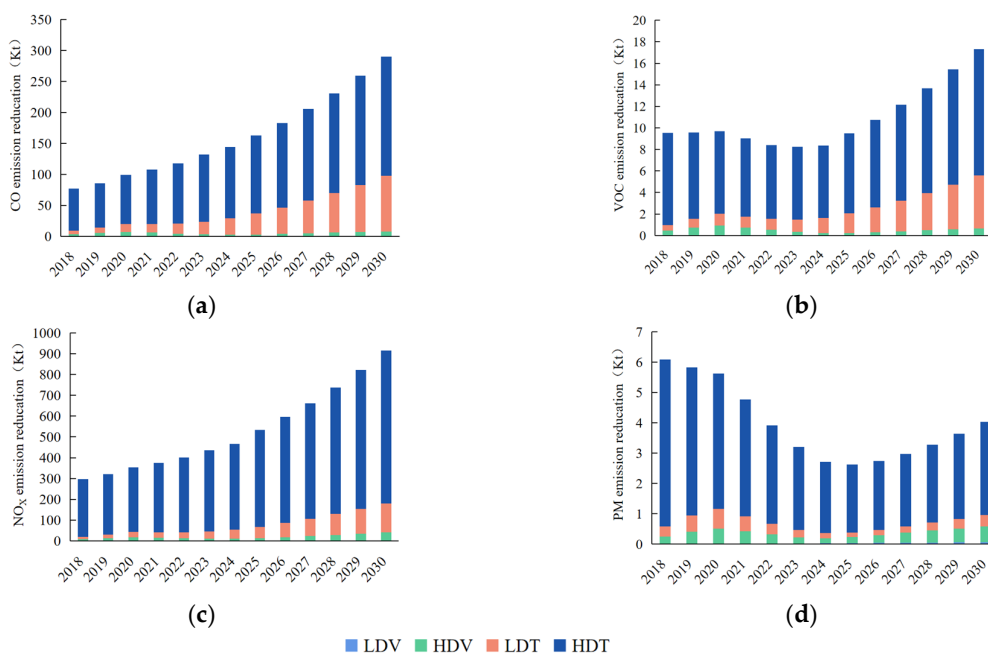

**Figure S6.** Pollutant emission reduction of diesel vehicles under the CS scenario in Hebei.

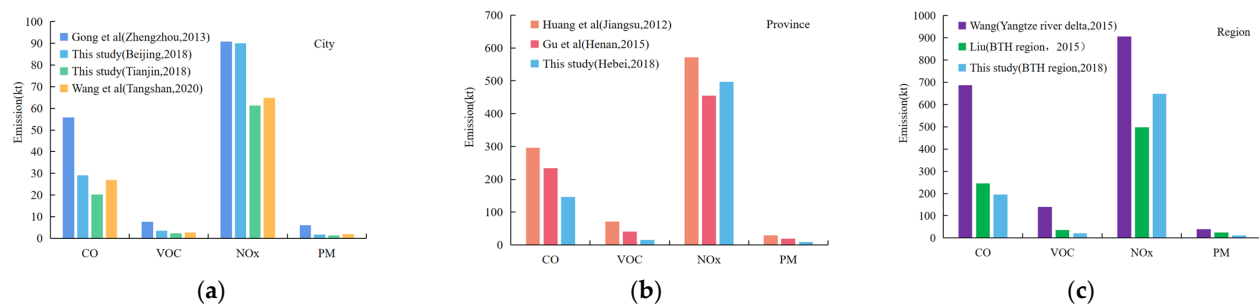

Figure S7. Comparison with other studies.

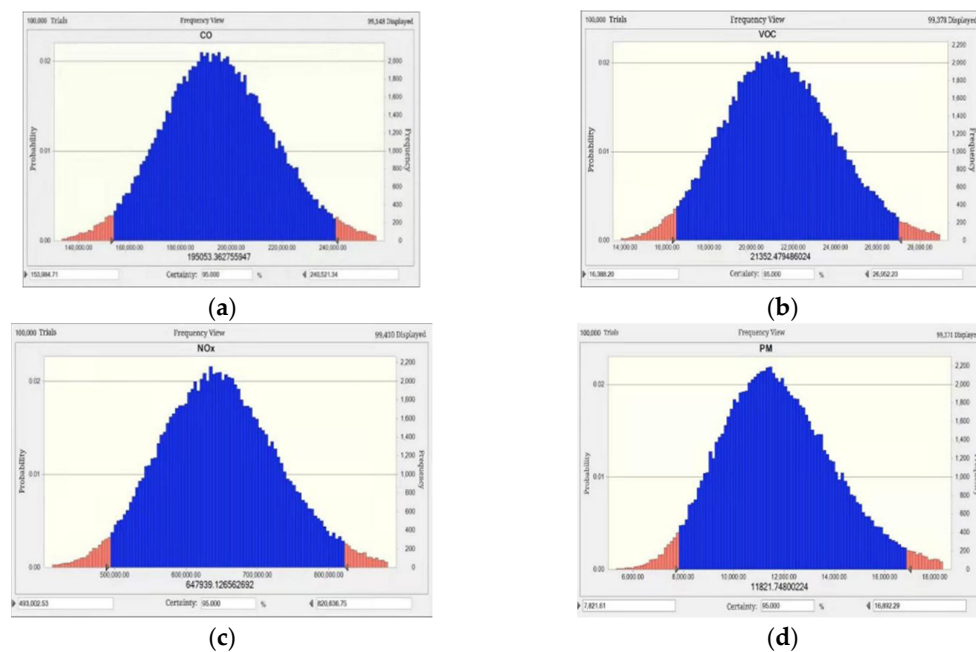

Figure S8. The distribution map of uncertainty analysis.
